# Supplementary material for: Association of food insecurity on gut microbiome and metabolome profiles in a diverse college-based sample
Source: PubMed Central journal article supplement (PMC9399224; doi:10.1038/s41598-022-18515-y), 2022-08-23
Supplement: 41598_2022_18515_MOESM1_ESM.pdf [file 41598_2022_18515_MOESM1_ESM.pdf]

## Supplementary Information

---

### Association of food insecurity on gut microbiome and metabolome profiles in a diverse college-based sample

Alex E. Mohr, MS<sup>1+</sup>; Paniz Jasbi, PhD<sup>1,2+</sup>; Kiley B. Vander Wyst, PhD, MPH, RD<sup>3</sup>; Irene van Woerden, PhD, MS<sup>4</sup>; Xiaojian Shi, PhD<sup>1,5</sup>; Haiwei Gu, PhD<sup>1,6</sup>; Corrie M. Whisner, PhD<sup>1,7\*</sup>; Meg Bruening, PhD, MPH, RD<sup>1\*</sup>

<sup>1</sup>College of Health Solutions, Arizona State University, Phoenix, AZ, USA

<sup>2</sup>School of Molecular Sciences, Arizona State University, Tempe, AZ, USA

<sup>3</sup>College of Graduate Studies, Northwestern University, Glendale, AZ, USA

<sup>4</sup>Community and Public Health, Idaho State University, Pocatello, ID, USA

<sup>5</sup>Systems Biology Institute, Yale University, West Haven, CT, USA

<sup>6</sup>Center for Translational Science, Florida International University, Port St. Lucie, FL, USA

<sup>7</sup>Biodesign Institute Health Through Microbiomes Center, Arizona State University, Tempe, AZ, USA

<sup>+</sup>These authors contributed equally

<sup>\*</sup>Corresponding authors

Email: [Meg.Bruening@asu.edu](mailto:Meg.Bruening@asu.edu); [cwhisner@asu.edu](mailto:cwhisner@asu.edu)

---

**Page S-4, Table S1.** Alpha and beta diversity metrics for food insecure and food secure status.

**Pages S-5 to S-6, Table S2.** Top 10 lowest (set 1) and highest (set 2) ranked genera associated with food security as produced by Songbird analysis.

**Page S-7, Table S3.** Top 10 lowest (set 1) and highest (set 2) ranked predicted microbial functions associated with food security as produced by Songbird analysis.

**Pages S-8 to S-9, Table S4.** Taxa generated from gut microbiome analysis with greatest fecal metabolite cooccurrence as produced by mmvec analysis.

**Page S-10, Figure S1.** Pattern search analysis performed via SparCC identified four dominant taxa, **a** *Bacteroides*, **b** *Blautia*, **c** *Alistipes*, and **d** *Faecalibacterium*. The top 25 taxa are displayed, ranked by correlation coefficient with red and blue denoting positive and negative correlations, respectively. The adjacent heat map for each plot displays which group the relative abundance is weighted towards (red = increased; blue = decreased).

**Page S-11, Figure S2.** Predicted functional metabolic pathways by food security status. **a** Comparison of the log ratio of the 10 lowest (“Set 1”) and 10 highest (“Set 2”) ranked pathways associated with food security status (after filtering,  $n = 58$ ). **b** Food secure status had a significantly greater log ratio of Set 2 compared to Set 1 (Mann-Whitney U test:  $p < 0.05$ ).

**Page S-12, Figure S3.** Feature-wise distribution of metabolite concentrations before and after normalization. Data were square root transformed and auto scaled to approximate normality.

**Page S-13, Figure S4.** RF analysis performed on metabolite data using 500 decision trees indicates five outlying subjects between groups.

**Page S-14, Figure S5.** Two-dimensional scores plot of PCA conducted using the entire set of captured metabolites between groups. PCA was performed using normalized metabolite concentrations.

**Page S-15, Figure S6.** Disease and enzyme enrichment analysis performed via LASSO regression. **a** Disease enrichment analysis performed using 44 metabolite sets reported in human feces. **b** Enzyme enrichment analysis performed using 912 metabolite sets predicted to change in the case of dysfunctional enzymes.

**Page S-16, Figure S7.** Pathway analysis performed a global test of relative-betweenness centrality. Detected study metabolites were mapped to the KEGG human database.

**Page S-17, Figure S8.** Quality-based filtering processes for microbiome data. Quality scores based on rarefaction assessment for **a** Forward and **b** Reverse reads. **c** Low abundance/low

prevalence amplicon sequence variants (ASVs) were filtered out using the feature-table plugin with the filter-samples method (--p-min-frequency 10; --p-min-samples 2). **d** To account for uneven sequencing depth between samples, normalization was performed via alpha rarefaction for observed features and Shannon index. Based on the ASV feature table, a p-min-depth of 10 and a p-max-depth of 120,000 was used. **e** Based on assessment of alpha rarefaction a threshold of 22,000 sequences/sample was established leaving 58/60 high quality samples for analysis (participants DW09 and DW96 were removed).

---

**Table S1.** Alpha and beta diversity metrics for food insecure and food secure status.

| <b>Alpha diversity metric</b> | <b>Food insecure<br/>(<i>n</i> = 22)</b> | <b>Food secure<br/>(<i>n</i> = 38)</b> | <b><i>F</i>-statistic</b>   | <b><i>p</i></b> |
|-------------------------------|------------------------------------------|----------------------------------------|-----------------------------|-----------------|
| Observed Features             | 161.50 ± 10.89                           | 143.08 ± 7.14                          | 2.21                        | 0.143           |
| Faith's PD                    | 16.77 ± 0.93                             | 15.33 ± 0.77                           | 1.41                        | 0.241           |
| Pielou's E                    | 0.71 ± 0.02                              | 0.68 ± 0.01                            | 3.96                        | 0.050           |
| Shannon                       | 5.21 ± 0.16                              | 4.85 ± 0.13                            | 4.13                        | 0.047           |
| <b>Beta diversity metric</b>  | <b>Sum of Squares</b>                    | <b><i>F</i>-statistic</b>              | <b><i>R</i><sup>2</sup></b> | <b><i>p</i></b> |
| Jaccard                       | 0.374                                    | 1.252                                  | 0.02                        | 0.050           |
| Bray Curtis                   | 0.248                                    | 0.922                                  | 0.01                        | 0.579           |
| Unweighted UniFrac            | 0.224                                    | 1.376                                  | 0.02                        | 0.080           |
| Weighted UniFrac              | 0.084                                    | 1.069                                  | 0.02                        | 0.326           |

Alpha diversity values for food security status displayed as mean ± SD.

**Table S2.** Top 10 lowest (set 1) and highest (set 2) ranked genera associated with food security as produced by Songbird analysis.

| Set 1 | Feature                                                                                                                           | Intercept | Log FC (Food Insecure) |
|-------|-----------------------------------------------------------------------------------------------------------------------------------|-----------|------------------------|
| 1     | d__Bacteria;p__Proteobacteria;c__Gammaproteobacteria;o__Enterobacteriales;f__Enterobacteriaceae;__                                | 0.813     | -2.621                 |
| 2     | d__Bacteria;p__Firmicutes;c__Clostridia;o__Lachnospirales;f__Lachnospiraceae;g__Eisenbergiella                                    | 2.650     | -2.116                 |
| 3     | d__Bacteria;p__Firmicutes;c__Clostridia;o__Oscillospirales;f__Ruminococcaceae;g__Angelakisella                                    | -0.973    | -1.643                 |
| 4     | d__Bacteria;p__Bacteroidota;c__Bacteroidia;o__Bacteroidales;f__Porphyromonadaceae;g__Porphyromonas                                | 0.782     | -1.473                 |
| 5     | d__Bacteria;p__Firmicutes;c__Clostridia;o__Lachnospirales;f__Lachnospiraceae;g__Lachnospiraceae_UCG-001                           | 0.303     | -1.454                 |
| 6     | d__Bacteria;p__Firmicutes;c__Clostridia;o__Lachnospirales;f__Defluviitaleaceae;g__Defluviitaleaceae_UCG-011                       | 0.818     | -1.432                 |
| 7     | d__Bacteria;p__Firmicutes;c__Negativicutes;o__Veillonellales-Selenomonadales;f__Veillonellaceae;g__Veillonella                    | -0.537    | -1.417                 |
| 8     | d__Bacteria;p__Firmicutes;c__Clostridia;o__Oscillospirales;f__Ruminococcaceae;g__[Eubacterium]_siraeum_group                      | 4.311     | -1.317                 |
| 9     | d__Bacteria;p__Firmicutes;c__Clostridia;o__Clostridia_vadinBB60_group;f__Clostridia_vadinBB60_group;g__Clostridia_vadinBB60_group | 1.323     | -1.314                 |
| 10    | d__Bacteria;p__Firmicutes;c__Bacilli;o__Erysipelotrichales;f__Erysipelotrichaceae;g__Turcibacter                                  | -0.537    | -1.258                 |
| Set 2 | Feature                                                                                                                           | Intercept | Log FC (Food secure)   |
| 1     | d__Bacteria;p__Firmicutes;c__Clostridia;__;__;__                                                                                  | 1.538     | 2.830                  |
| 2     | d__Bacteria;p__Firmicutes;c__Negativicutes;o__Veillonellales-Selenomonadales;f__Veillonellaceae;g__Megasphaera                    | -4.670    | 2.507                  |
| 3     | d__Bacteria;p__Firmicutes;c__Bacilli;o__Erysipelotrichales;f__Erysipelotrichaceae;g__Holdemanelia                                 | -1.853    | 2.350                  |
| 4     | d__Bacteria;p__Firmicutes;c__Bacilli;o__RF39;f__RF39;g__RF39                                                                      | -5.227    | 1.399                  |
| 5     | d__Bacteria;p__Proteobacteria;c__Gammaproteobacteria;o__Burkholderiales;f__Sutterellaceae;g__Sutterella                           | 2.359     | 1.347                  |
| 6     | d__Bacteria;p__Firmicutes;c__Clostridia;o__Oscillospirales;f__Ruminococcaceae;__                                                  | -0.702    | 1.317                  |
| 7     | d__Bacteria;p__Bacteroidota;c__Bacteroidia;o__Bacteroidales;f__Prevotellaceae;g__Prevotella                                       | 0.058     | 1.194                  |
| 8     | d__Bacteria;p__Firmicutes;c__Clostridia;o__Oscillospirales;f__Oscillospiraceae;__                                                 | -2.858    | 1.092                  |

|    |                                                                                                                   |        |       |
|----|-------------------------------------------------------------------------------------------------------------------|--------|-------|
| 9  | d__Bacteria;p__Firmicutes;c__Bacilli;o__Erysipelotrichales;f__Erysipelatoclostridiaceae;g__Erysipelatoclostridium | -0.513 | 1.034 |
| 10 | d__Bacteria;p__Firmicutes;c__Clostridia;o__Clostridia;f__Hungateiclostridiaceae;g__Ruminiclostridium              | 2.917  | 0.926 |

---

**Table S3.** Top 10 lowest (set 1) and highest (set 2) ranked predicted microbial functions associated with food security as produced by Songbird analysis.

| <b>Set 1</b> | <b>Feature</b>                                                 | <b>Intercept</b> | <b>Log FC (Food Insecure)</b> |
|--------------|----------------------------------------------------------------|------------------|-------------------------------|
| 1            | Adenosylcobinamide hydrolase                                   | -3.527           | -2.089                        |
| 2            | GDP-perosamine synthase                                        | 4.581            | -1.881                        |
| 3            | Chlorite O(2)-lyase                                            | -2.575           | -1.741                        |
| 4            | "1,3-propanediol dehydrogenase"                                | 1.543            | -1.714                        |
| 5            | IgA-specific serine endopeptidase                              | -2.857           | -1.484                        |
| 6            | 3-deoxy-D-manno-octulosonic acid kinase                        | -3.027           | -1.399                        |
| 7            | Nitric-oxide reductase (cytochrome c)                          | -3.597           | -1.353                        |
| 8            | Ribonuclease T(2)                                              | -4.853           | -1.346                        |
| 9            | "Guanosine-3',5'-bis(diphosphate) 3'-diphosphatase"            | -4.193           | -1.307                        |
| 10           | Nitrite reductase (NO-forming)                                 | -4.015           | -1.302                        |
| <b>Set 2</b> | <b>Feature</b>                                                 | <b>Intercept</b> | <b>Log FC (Food secure)</b>   |
| 1            | UDP-N-acetylmuramoylpentapeptide-lysine N(6)-alanyltransferase | -4.196           | 2.054                         |
| 2            | Phosphonoacetate hydrolase                                     | 1.728            | 1.672                         |
| 3            | Arginyltransferase                                             | -4.138           | 1.625                         |
| 4            | Quinate/shikimate dehydrogenase                                | 0.667            | 1.421                         |
| 5            | Acylaminoacyl-peptidase                                        | -3.333           | 1.302                         |
| 6            | 4-hydroxybenzoyl-CoA thioesterase                              | 0.859            | 1.256                         |
| 7            | Allantoin racemase                                             | -0.322           | 1.246                         |
| 8            | 6-phospho-beta-galactosidase                                   | -4.226           | 1.224                         |
| 9            | Site-specific DNA-methyltransferase (cytosine-N(4)-specific)   | -0.662           | 1.202                         |
| 10           | Acetolactate decarboxylase                                     | -1.117           | 1.151                         |

**Table S4.** Taxa generated from gut microbiome analysis with greatest fecal metabolite cooccurrence as produced by mmvec analysis.

| Taxa                                                                                                              | Metabolite                          | mmvecRank |
|-------------------------------------------------------------------------------------------------------------------|-------------------------------------|-----------|
| <b>Food Insecure</b>                                                                                              |                                     |           |
| d__Bacteria;p__Firmicutes;c__Bacilli;o__Erysipelotrichales;f__Erysipelotrichaceae;g__[Clostridium]_innocuum_group | L_Alloisoleucine_Leucine_Norleucine | 4.518     |
|                                                                                                                   | Isoleucine                          | 4.173     |
|                                                                                                                   | Valine                              | 3.703     |
|                                                                                                                   | Phenylalanine                       | 3.423     |
|                                                                                                                   | Proline                             | 3.049     |
| d__Bacteria;p__Firmicutes;c__Clostridia;o__Lachnospirales;f__Lachnospiraceae;g__Lachnospiraceae_FCS020_group      | L_Alloisoleucine_Leucine_Norleucine | 4.241     |
|                                                                                                                   | Isoleucine                          | 3.714     |
|                                                                                                                   | Valine                              | 3.436     |
|                                                                                                                   | Phenylalanine                       | 3.185     |
| d__Bacteria;p__Firmicutes;c__Clostridia;o__Lachnospirales;f__Lachnospiraceae;g__Lachnospiraceae_UCG-008           | Isobutyric_acid                     | 2.828     |
|                                                                                                                   | L_Alloisoleucine_Leucine_Norleucine | 4.638     |
|                                                                                                                   | Isoleucine                          | 4.449     |
|                                                                                                                   | Valine                              | 3.795     |
| d__Bacteria;p__Firmicutes;c__Clostridia;o__Oscillospirales;f__Oscillospiraceae;__                                 | Phenylalanine                       | 3.504     |
|                                                                                                                   | Proline                             | 3.318     |
|                                                                                                                   | Isoleucine                          | 5.093     |
|                                                                                                                   | L_Alloisoleucine_Leucine_Norleucine | 5.016     |
| d__Bacteria;p__Firmicutes;c__Clostridia;o__Oscillospirales;f__Ruminococcaceae;__                                  | Valine                              | 4.228     |
|                                                                                                                   | Proline                             | 4.071     |
|                                                                                                                   | Phenylalanine                       | 3.827     |
|                                                                                                                   | L_Alloisoleucine_Leucine_Norleucine | 4.164     |
|                                                                                                                   | Isoleucine                          | 3.515     |
|                                                                                                                   | Valine                              | 3.348     |
|                                                                                                                   | Phenylalanine                       | 3.140     |
|                                                                                                                   | Isobutyric_acid                     | 2.989     |
| <b>Food Secure</b>                                                                                                |                                     |           |
| d__Bacteria;p__Cyanobacteria;c__Cyanobacteriia;o__Chloroplast;f__Chloroplast;g__Chloroplast                       | Isoleucine                          | 5.088     |
|                                                                                                                   | L_Alloisoleucine_Leucine_Norleucine | 4.647     |
|                                                                                                                   | Valine                              | 3.585     |
|                                                                                                                   | Phenylalanine                       | 3.129     |
| d__Bacteria;p__Firmicutes;c__Bacilli;o__Erysipelotrichales;f__Erysipelotrichaceae;g__[Clostridium]_innocuum_group | Stearic_acid                        | 2.761     |
|                                                                                                                   | Isoleucine                          | 5.155     |
|                                                                                                                   | L_Alloisoleucine_Leucine_Norleucine | 4.775     |
|                                                                                                                   | Valine                              | 3.687     |
| d__Bacteria;p__Firmicutes;c__Clostridia;o__Lachnospirales;f__Lachnospiraceae;g__GCA-900066575                     | Phenylalanine                       | 3.248     |
|                                                                                                                   | Pyroglutamic_acid                   | 2.673     |
|                                                                                                                   | Creatine                            | 4.884     |
|                                                                                                                   | Isoleucine                          | 4.104     |
| d__Bacteria;p__Firmicutes;c__Clostridia;o__Lachnospirales;f__Lachnospiraceae;g__GCA-900066575                     | Acetylcholine                       | 3.721     |
|                                                                                                                   | L_Alloisoleucine_Leucine_Norleucine | 3.711     |
|                                                                                                                   | Carnosine                           | 2.951     |
|                                                                                                                   | Isoleucine                          | 5.181     |
| d__Bacteria;p__Firmicutes;c__Clostridia;o__Lachnospirales;f__Lachnospiraceae;g__GCA-900066575                     | L_Alloisoleucine_Leucine_Norleucine | 4.834     |



|                                      |                                     |       |
|--------------------------------------|-------------------------------------|-------|
| aceae;g__Lachnospiraceae_FCS020      | Valine                              | 3.727 |
| _group                               | Phenylalanine                       | 3.291 |
|                                      | Pyroglutamic_acid                   | 2.707 |
| d__Bacteria;p__Firmicutes;c__Clostri | Isoleucine                          | 4.652 |
| dia;o__Lachnospirales;f__Lachnospir  | L_Alloisoleucine_Leucine_Norleucine | 4.265 |
| aceae;g__Lachnospiraceae_UCG-        | Valine                              | 3.068 |
| 008                                  | Creatine                            | 3.043 |
|                                      | Phenylalanine                       | 2.637 |

---

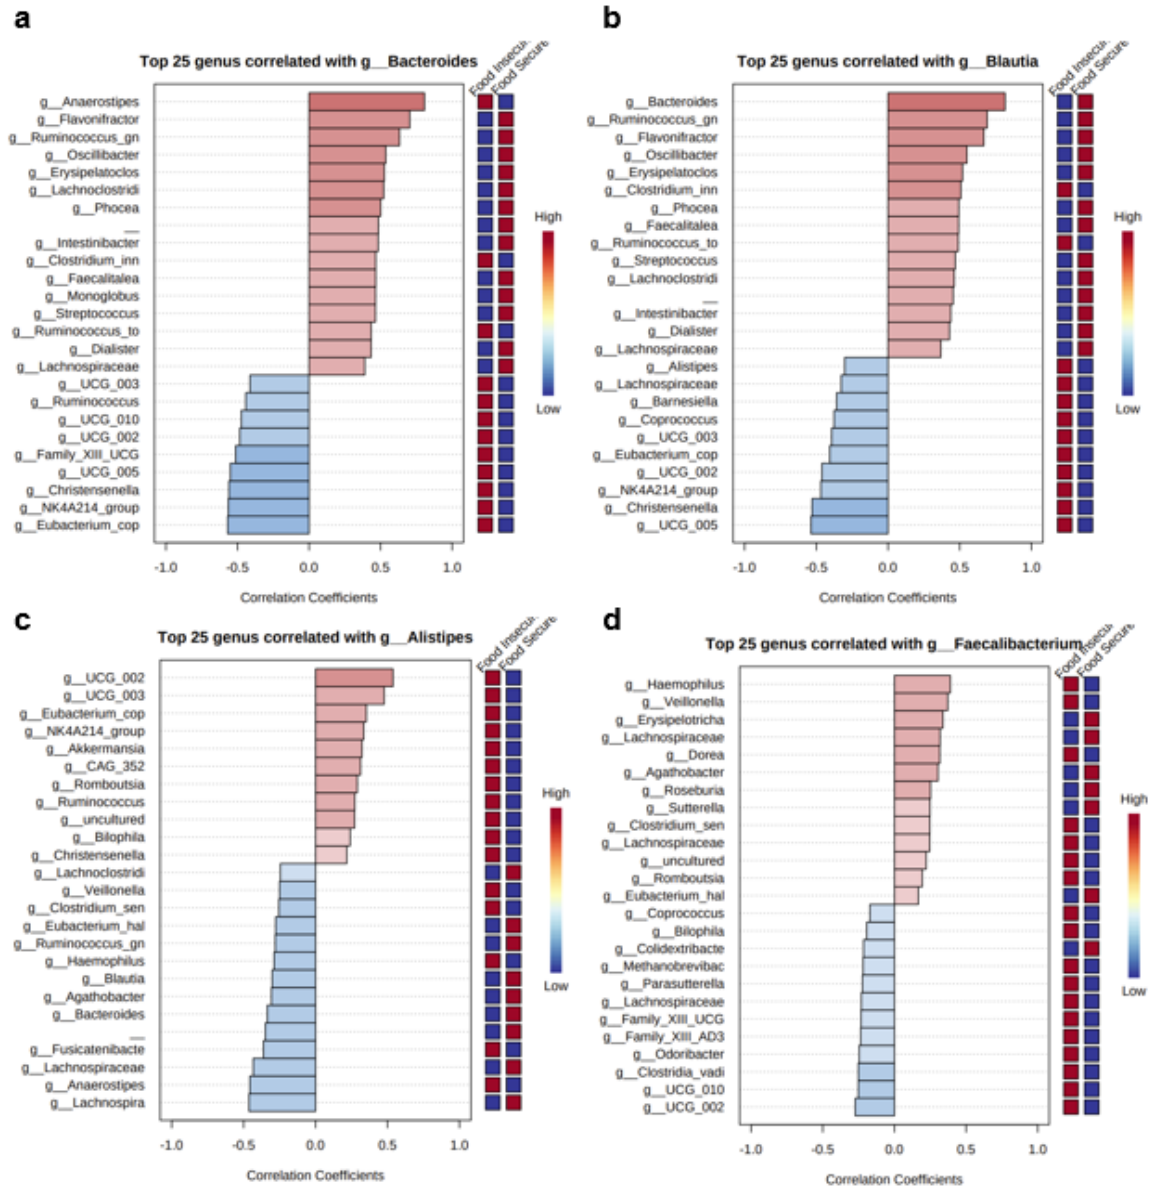

**Figure S1.** Pattern search analysis performed via SparCC identified four dominant taxa, **a** *Bacteroides*, **b** *Blautia*, **c** *Alistipes*, and **d** *Faecalibacterium*. The top 25 taxa are displayed, ranked by correlation coefficient with red and blue denoting positive and negative correlations, respectively. The adjacent heat map for each plot displays which group the relative abundance is weighted towards (red = increased; blue = decreased).

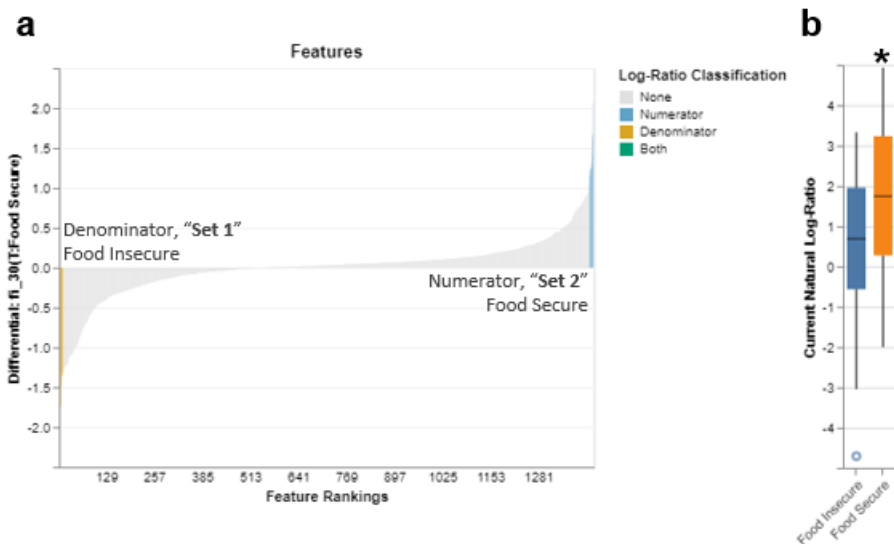

**Figure S2.** Predicted functional metabolic pathways by food security status. **a** Comparison of the log ratio of the 10 lowest ("Set 1") and 10 highest ("Set 2") ranked pathways associated with food security status (after filtering,  $n = 58$ ). **b** Food secure status had a significantly greater log ratio of Set 2 compared to Set 1 (Mann-Whitney U test:  $p < 0.05$ ).

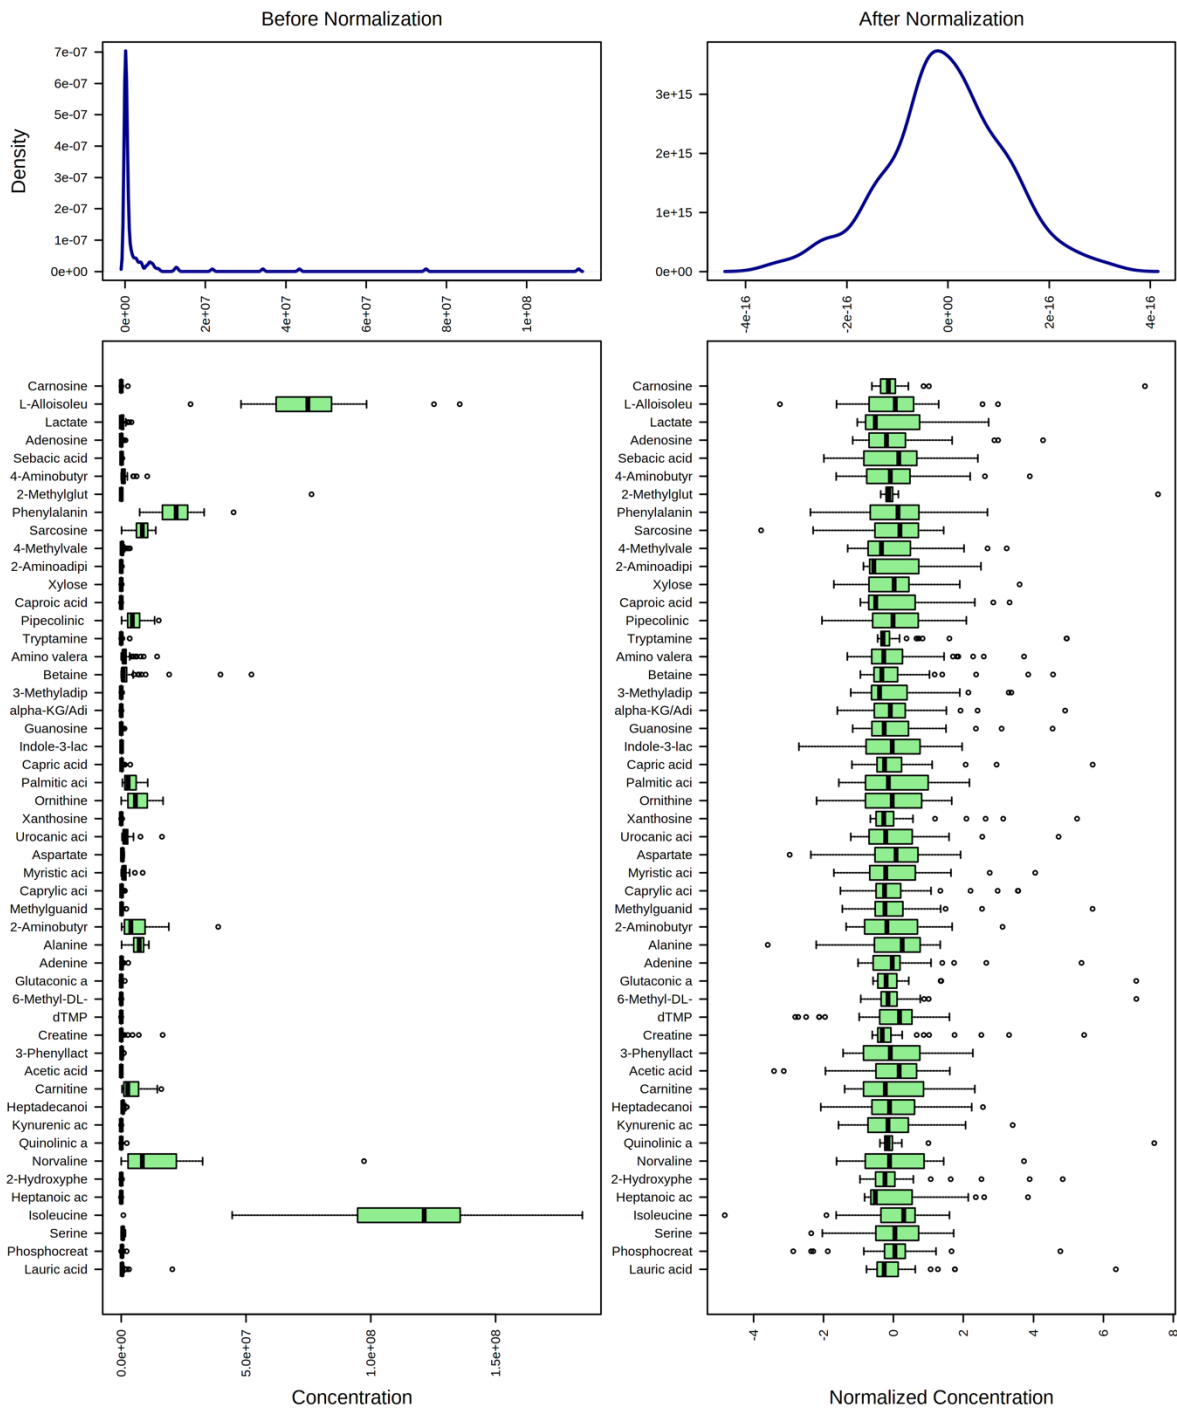

**Figure S3.** Feature-wise distribution of metabolite concentrations before and after normalization.

Data were square root transformed and auto scaled to approximate normality.

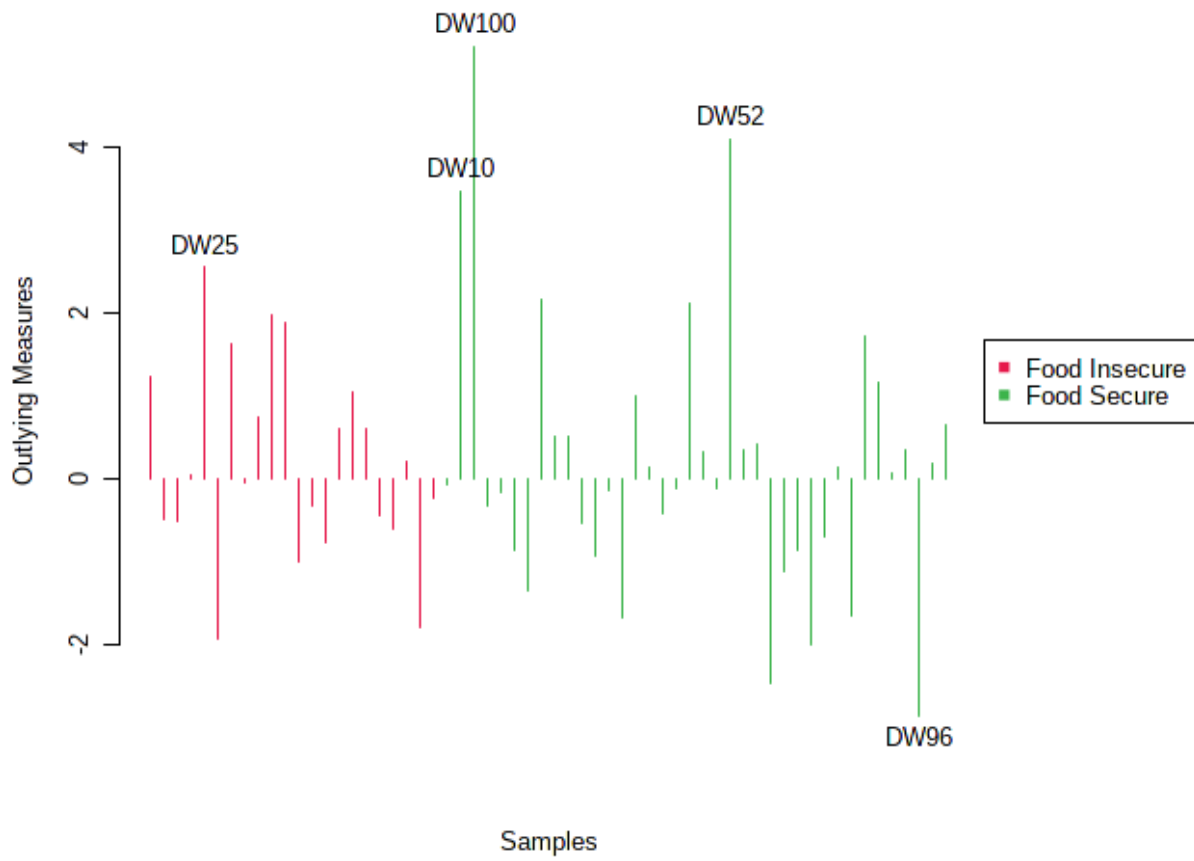

**Figure S4.** RF analysis performed on metabolite data using 500 decision trees indicates five outlying subjects between groups.

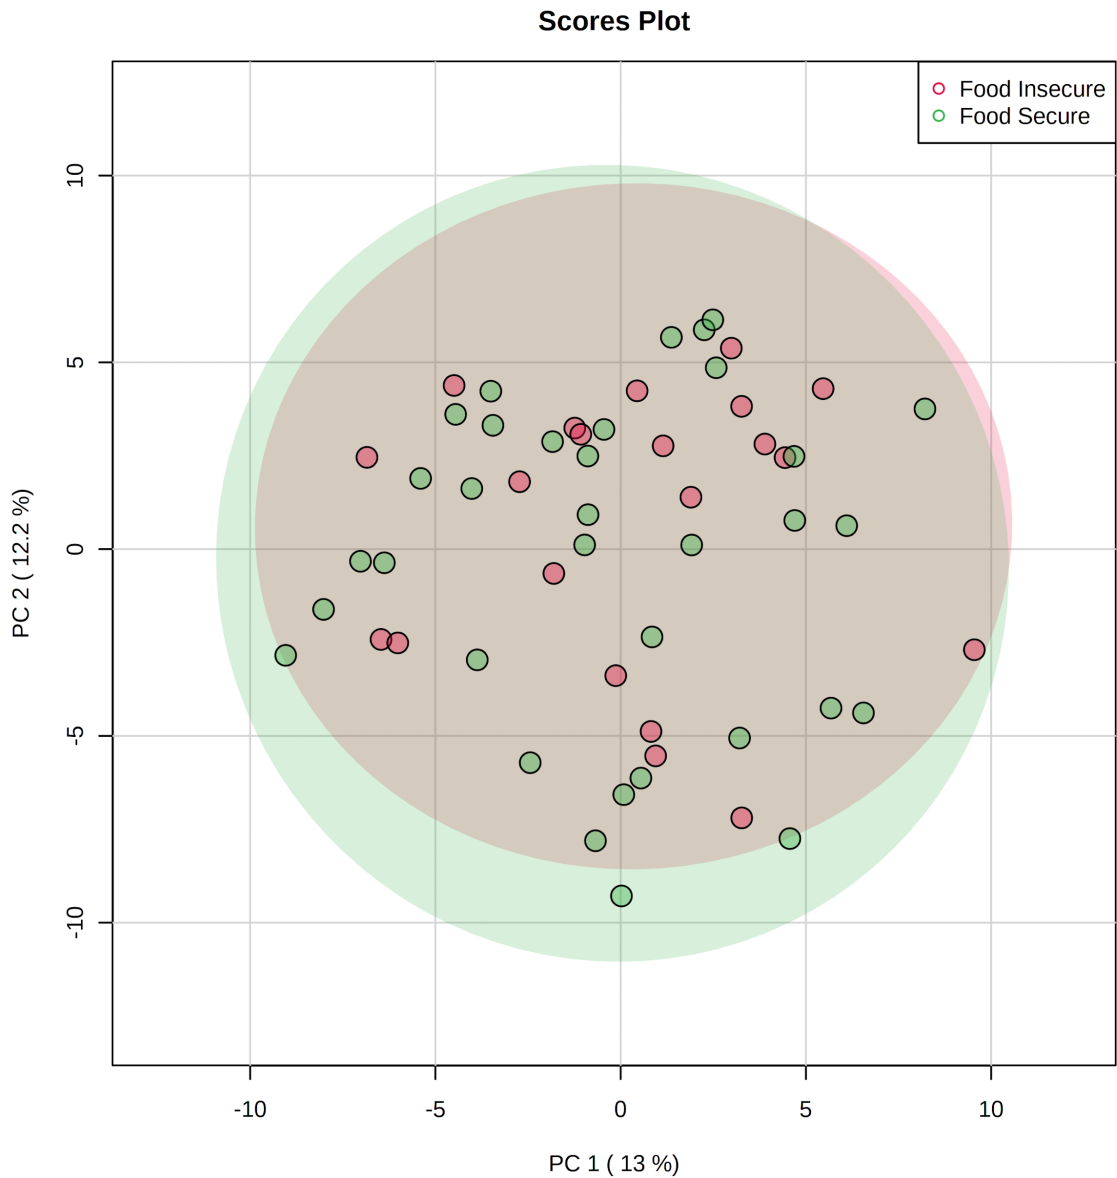

**Figure S5.** Two-dimensional scores plot of PCA conducted using the entire set of captured metabolites between groups. PCA was performed using normalized metabolite concentrations.

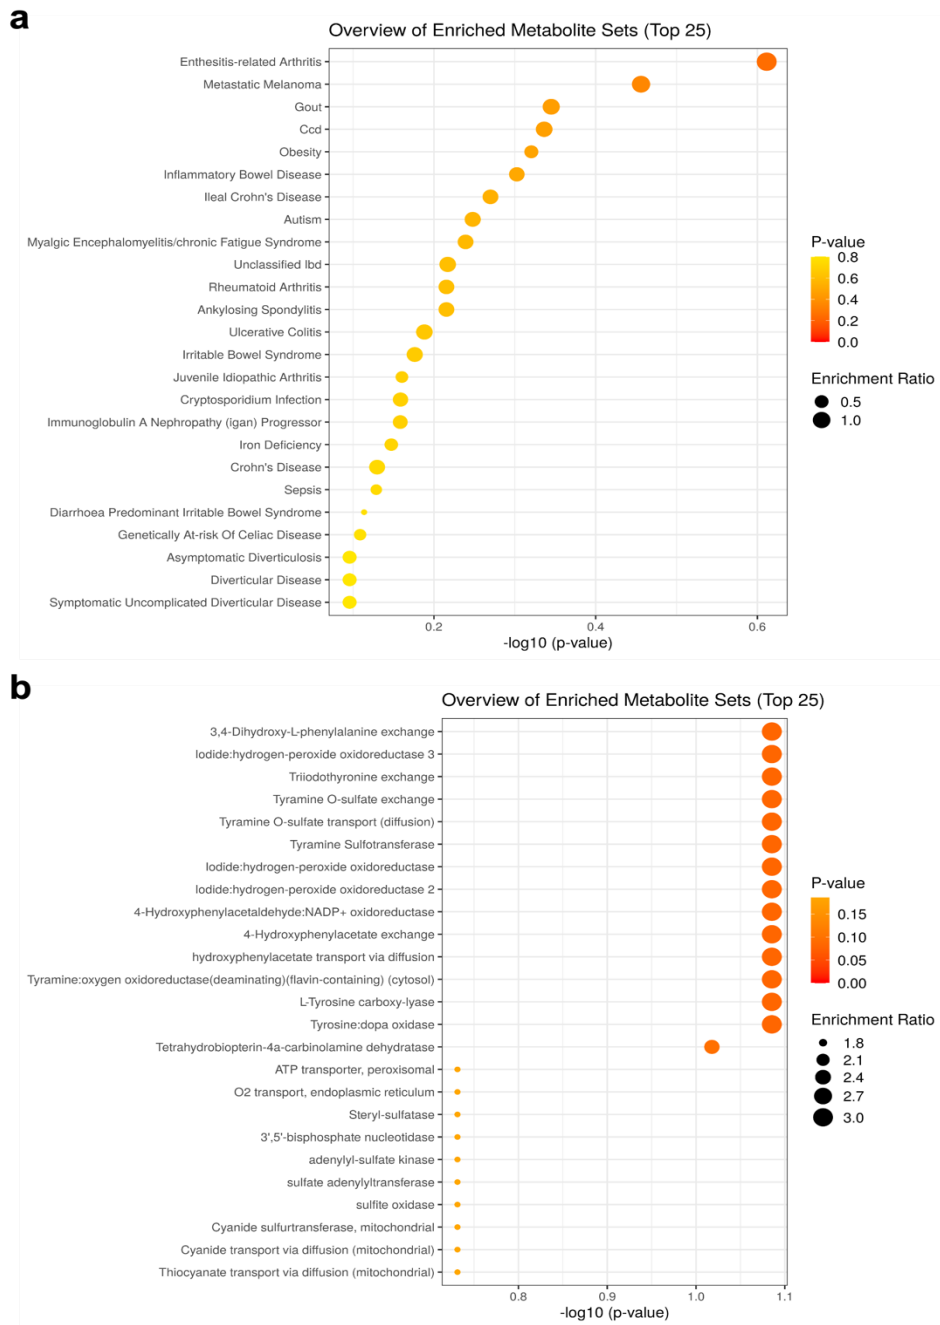

**Figure S6.** Disease and enzyme enrichment analysis performed via LASSO regression. **a** Disease enrichment analysis performed using 44 metabolite sets reported in human feces. **b** Enzyme enrichment analysis performed using 912 metabolite sets predicted to change in the case of dysfunctional enzymes.

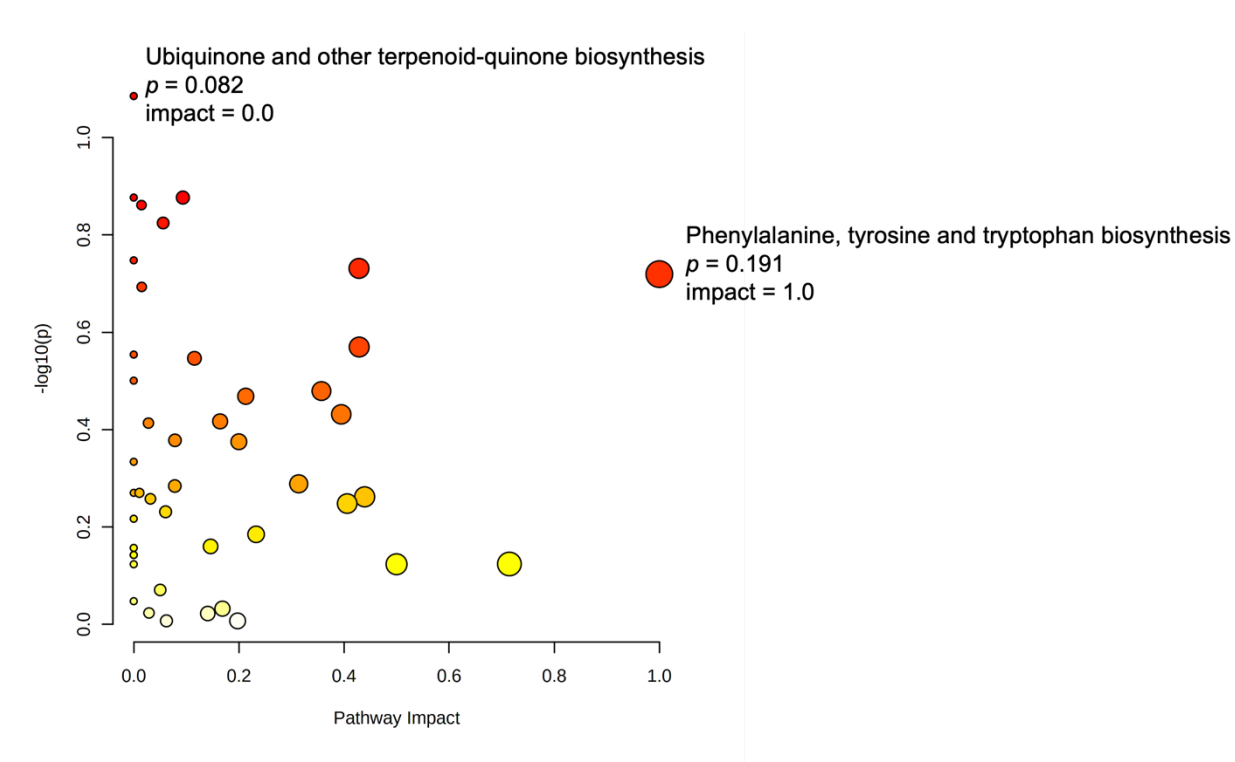

**Figure S7.** Pathway analysis performed a global test of relative-betweenness centrality. Detected study metabolites were mapped to the KEGG human database.



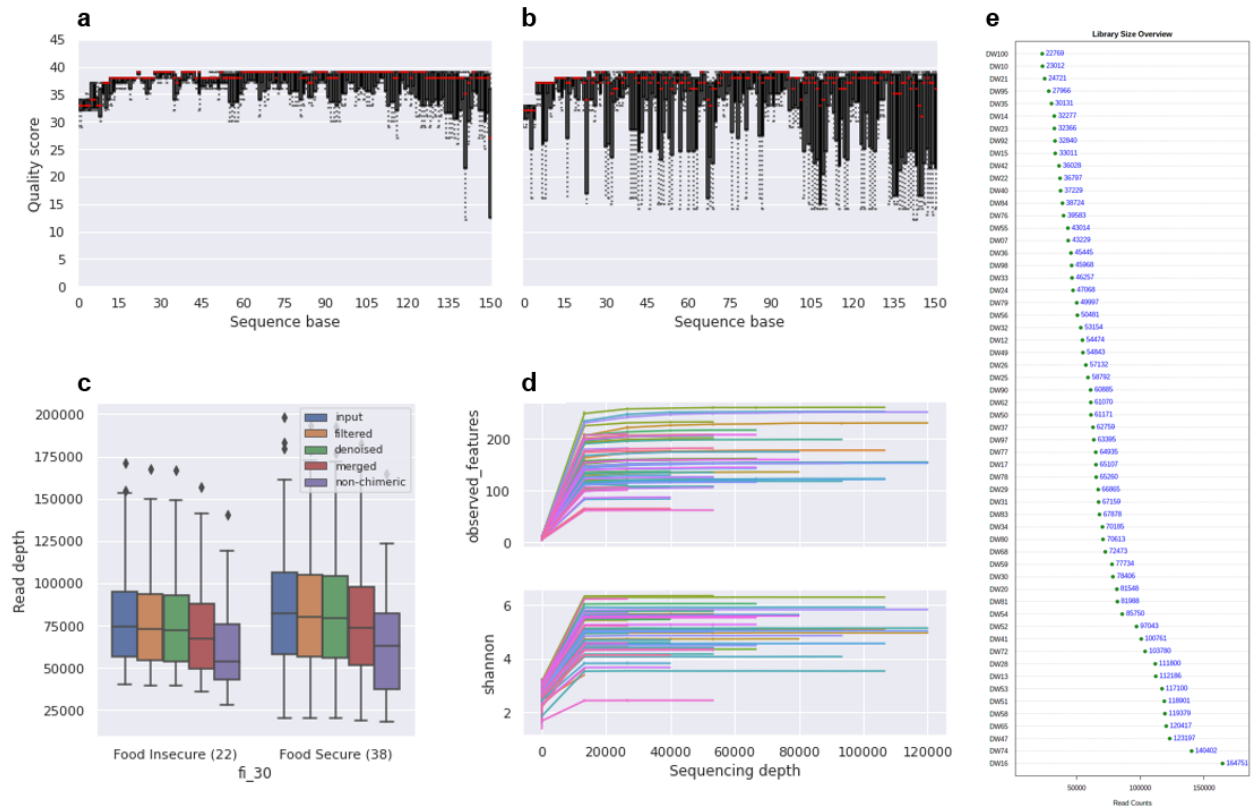

**Figure S8.** Quality-based filtering processes for microbiome data. Quality scores based on rarefaction assessment for **a** Forward and **b** Reverse reads. **c** Low abundance/low prevalence amplicon sequence variants (ASVs) were filtered out using the feature-table plugin with the filter-samples method (--p-min-frequency 10; --p-min-samples 2). **d** To account for uneven sequencing depth between samples, normalization was performed via alpha rarefaction for observed features and Shannon index. Based on the ASV feature table, a p-min-depth of 10 and a p-max-depth of 120,000 was used. **e** Based on assessment of alpha rarefaction a threshold of 22,000 sequences/sample was established leaving 58/60 high quality samples for analysis (participants DW09 and DW96 were removed).
